# Supplementary material
Source: publisher figshare collection journal article supplement (https://gsajournals.figshare.com/ndownloader/files/25011740)
Supplement: Supplementary file 1 [file 25011740]

**Table S6. Primer sequences for qRT-PCR analysis**

| **Gene Target** | **Forward Primer** | **Reverse Primer** |
| --- | --- | --- |
| *Relish* (*Rel*) | AGTGGTCCAAGAAGACAGAAAG | GAACAGAGCCGGTCGTAAAT |
| *Dorsal-Related immunity factor* (*Dif*) | CAGTTTGCTACGACCGGAGAGCTA | GAATATCCGCCAGTTGCAGAGTGC |
| *Dorsal* (*dl*) | CAACCCTTTGGGCTTTCTTATC | GTGCTGTTGTGGTTGTAGTTG |
| *Metchnikowin* (*Mtk*) | CATCAATCAATTCCCGCCACCGAG | AAATGGGTCCCTGGTGACGATGAG |
| *Drosomycin* (*Drs*) | AGTACTTGTTCGCCCTCTTCGCTG | CCTTGTATCTTCCGGACAGGCAGT |
| *Attacin C* (*AttC*) | CTGCACTGGACTACTCCCACATCA | CGATCCTGCGACTGCCAAAGATTG |
| *Diptericin B* (*DptB*) | AGGATTCGATCTGAGCCTCAACGG | TGAAGGTATACACTCCACCGGCTC |
| *Ribosomal protein L32* (*RpL32*) | GACGCTTCAAGGGACAGTATCTG | AAACGCGGTTCTGCATGAG |
